# Supplementary material
Source: PubMed Central journal article supplement (PMC2929739)
Supplement: JCI43565sd.pdf [file JCI43565sd.pdf]

## **Supplemental Material**

Supplemental Figures 1 to 7

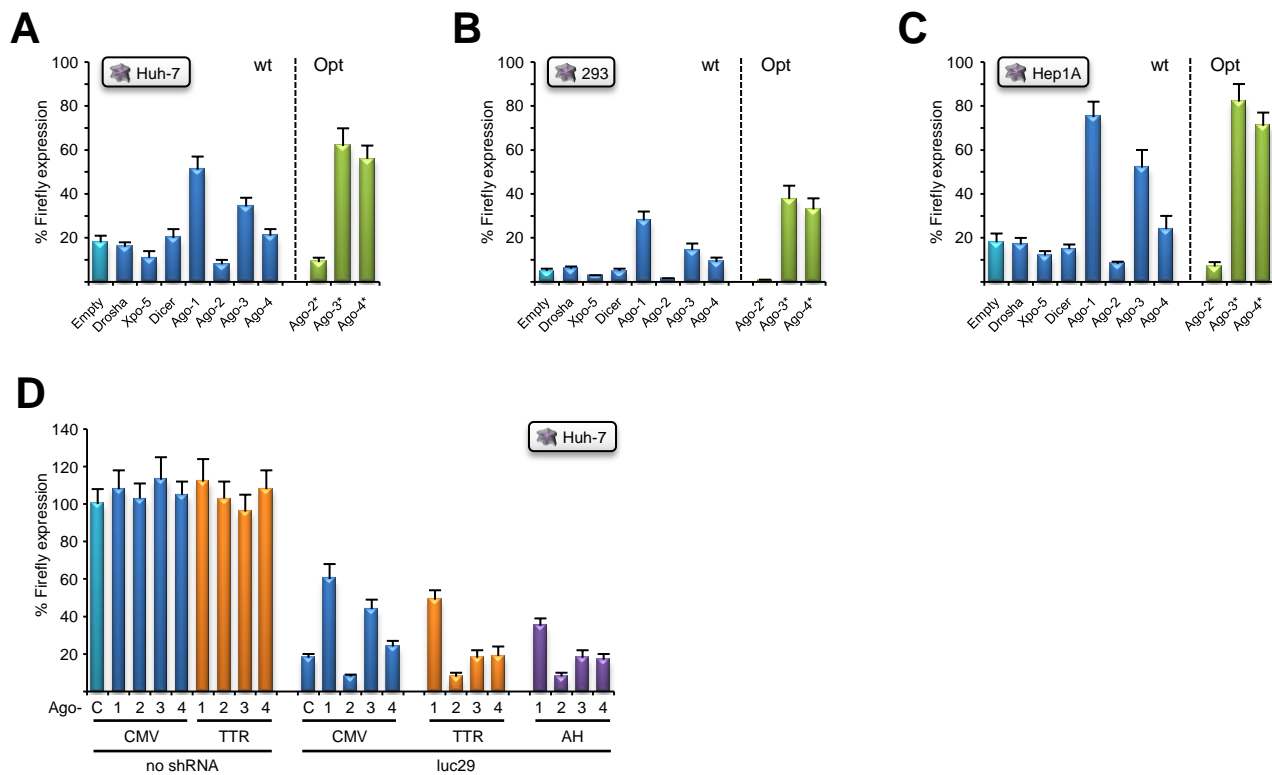

**Supplemental Figure 1** Confirmation in three further cell lines (A-C) that Ago-2 limits shRNA activity (see Figure 1, D and F for details). All values were normalized to a control lacking shRNA and RNAi proteins (not shown, set to 100%). (D) Ago-2 expression from various promoters consistently enhanced shRNA activity in Huh-7 cells, as compared to a control (C, not expressing any Ago protein). Wildtype Ago cDNAs were used in this panel. AH, liver/hepatoma-specific ApoE/hAAT enhancer/promoter.

wt ATGTACTCGGGAGCCGGCCCCGCACTTGCACCTCCTGCGCCGCGCCGCCCATCCAAGGATATGCCTCAAGCCCTCCACCTAGACCCGACTTTGGGACCTCCGGGAAACAATCAAATTA 120  
opt ATGTACAGCGGAGCCGGCCCCGCTGCCTGGCCCTCCTGCCCCCTCCCCCATCCAGGGCTACCGCTTCAAGCCCTCCAGGCGGACTTCCGGACCCAGCGGCCGACCATCAAGCTG 120  
\*\*\*\*\*

wt CAGGCCAATTTCTCGAAATGGACATCCCAAAATTCACATCTATCATATGAATTGGATATCAAGCCAGAGAAGTCCCGAGGAGTAAACAGGGAATCGTGAACACATGGTCCAG 240  
opt CAGGCCAATTTCTCGAGATGGACATCCCAAGATCGACATCAACCACACGAGCTGGACATCAAGCCGAGAAGTCCCGAGGCGGTAACCGGGAGATCGTGGAGACATGGTCCAG 240  
\*\*\*\*\*

wt CACTTTAAAACACAGATCTTTGGGGATCGGAAGCCCGTGTTCGACGCGAGGAATCTATACACAGCCATGCCCTCCGATTGGGAGGACAAAGTGGAGCTGGAGGTACGCTGCCA 360  
opt CACTTCAAGACCCAGATCTTCGGGACCGGAAGCCCGTGTTCGACGCGGAGGAATCTGTACACCGCCATGCCCTGCCATCGGCCGAGCAAGTGGAGCTGGAGGTGACCTGCC 360  
\*\*\*\*\*

wt GGAGAAGGCAAGGATCGCATCTTCAAGGTGTCCATCAAGTGGGTGCTGCTGCTGAGCTTGACAGGCTTACACGATGCACTTTCAGGGCGGCTGCCAGCGTCCCTTTGAGACGATCCAG 480  
opt GGCGAGGCAAGGACCGGATCTTCAAGGTGTCCATCAAGTGGGTGCTGCTGCTGAGCTTGACAGGCTTACACGATGCACTTTCAGGGCGGCTGCCAGCGTCCCTTTGAGACGATCCAG 480  
\*\*

wt GCCCTGGACGTGGTCATGAGGCACTTGCATCCATGAGGTACACCCCGTGGGCGCTCCTTCTTACCAGCGTCCGAAGGTGCTTAAACCTTTCGGGGGGGCGAGAAGTGTGGTTT 600  
opt GCCCTGGACGTGGTCATGAGGCACTTGCATCCATGAGGTACACCCCGTGGGCGCTCCTTCTTACCAGCGTCCGAAGGTGCTTAAACCTTTCGGGGGGGCGAGAAGTGTGGTTT 600  
\*\*\*\*\*

wt GGCTTCCATCAGTCCGTCGGCCCTTCTCTGGAATAATGATGCTGAATATGATGTGTGACGCAACAGCGTTTTTACAAGGCACAGCCAGTAATCGAGTTTGGTTTGTGAAGTTTGGATTTT 720  
opt GGCTTCCATCAGTCCGTCGGCCCTTCTCTGGAATAATGATGCTGAATATGATGTGTGACGCAACAGCGTTTTTACAAGGCACAGCCAGTAATCGAGTTTGGTTTGTGAAGTTTGGATTTT 720  
\*\*\*\*\*

wt AAAAGTATTGAAGAACAACAAAACCTCTGACAGATTCCCAAAGGTTAAAGTTTACCAAGAATTAAGGCTTAAAGTGGAGATAACGCACTGTGGCAGATGAAGAGGAAGTACCGT 840  
opt AAGAGCATCGAGGAACAGCAGAAGCCCTGACCCAGCAGCGGTTGAAGTTCACCAAGAGATCAAGGCGCTGAAGTGGAGATCACCCACTGCGGCCAGATGAAGCGGAAGTACAGA 840  
\*\*\*\*\*

wt GTCTGCAATGTGACCCGGCGCCGCACTCAACAAACATCCCGCTGACGAGGAGAGCGGGCAGACGGTGGAGTGCACGCTGGCCAGTATTTCAGGACAGGCACAAGTGGTCTGT 960  
opt GTGTGCAACGTGACCGAAGGCCCGCCAGCCACCAGACATTCCACTCCAACGAAAGCGGCCAGACCGTGCAGTGCACGCTGGCCAGTACTTCAGGACAGGCACAAGTGGTCTGT 960  
\*\*

wt CGCTACCCCACTCCCATGTTTACAAGTCGGACAGGAGCAGAAACACACCTACCTTCCCTGGAGTCTGTAACATTTGGCAGGACAAGATGATTAATAAATAAACGGACAATCAG 1080  
opt AGATACCCCACTCCCTGCTCAGTTCGGGACAGGACACACCTACCTGCGCTGGAAGTGTGCAACATCGTGGCCGCGAGGCGCATCAAGAACCTGACCGGACATTCAG 1080  
\*\*\*\*\*

wt ACCTCAACATGATCAGAGCGACTGCTAGTTCGGCCCGGATCGGCAAGAAGAGATAGCAAAATGATGCGAAGTGCAGTTTCAACACAGATCCATACGTCCTGTAATTTGGAATCATG 1200  
opt ACCAGCACATGATCAGAGCGACTGCTAGTTCGGCCCGGATCGGCAAGAAGAGATAGCAAAATGATGCGAAGTGCAGTTTCAACACAGATCCATACGTCCTGTAATTTGGAATCATG 1200  
\*\*\*\*\*

wt GTCAAAGATGAGATGACAGACGTGACTGGGCGGTGCTGCAGCCGCCCTCATCCTCTACGGGGCAGGAATAAAGCTATTGCGACCCCTGTCAGGGCGTCTGGGACATGCGGAACAAG 1320  
opt GTGAAGGACGAGATGACCGACGTGACCGGACAGTCTGCAGCCTCCAGCATCCTGTACGGCGGCAAGGCAAGCCATGCCACCCCGTGCAGGGCGTGGGACATGCGGAACAAG 1320  
\*\*\*\*\*

wt CAGTCCACAGGGGATCGAGATCAAGGTGTGGCCATTGCGTGTTCGCCCCAGCGCCAGTGCACGGAAGTCCATCTGAAGTCTTTCACAGAGCAGCTCAGAAGATCTCGAGAGAC 1440  
opt CAGTCCACAGGGGATCGAGATCAAGGTGTGGCCATTGCGTGTTCGCCCCAGCGCCAGTGCACGGAAGTCCATCTGAAGTCTTTCACAGAGCAGCTCAGAAGATCTCGAGAGAC 1440  
\*\*\*\*\*

wt GCCGGCATGCCATCCAGGGCCAGCGTCTCTGCAAAATACGCGCAGGGGCGGACAGCGTGGAGCCATGTTCCGGCACCTGAAGAACACGATCGGGCCCTGCAGTGGTGGTGGT 1560  
opt GCCGGCATGCCATCCAGGGCCAGCGTCTCTGCAAAATACGCGCAGGGGCGGACAGCGTGGAGCCATGTTCCGGCACCTGAAGAACACGATCGGGCCCTGCAGTGGTGGTGGT 1560  
\*\*\*\*\*

wt ATCTGCCGGCAAGACGCCCTGTACGCCGAGGTCAAGCGCTGGGAGACAGGCTGCTGGGATGGCCAGCAGTGCCTGCAGATGAAGAAGTGCAGAGGACACCAGCCAGACCCCTG 1680  
opt ATCTGCCGGCAAGACGCCCTGTACGCCGAGGTCAAGCGCTGGGAGACAGGCTGCTGGGATGGCCAGCAGTGCCTGCAGATGAAGAAGTGCAGAGGACACCAGCCAGACCCCTG 1680  
\*\*\*\*\*

wt TCCAACCTGCTCAGATCAACGTCAAGTGGAGGCGTGAACAACATCCTGCTGCCAGGGCAGGCGCCGCTGTTCCAGCAGCCGCTACTTCTTGGAGCAGACGCTCACTCAC 1800  
opt AGCAACCTGCTCAGATCAACGTCAAGTGGAGGCGTGAACAACATCCTGCTGCCAGGGCAGGCGCCGCTGTTCCAGCAGCCGCTACTTCTTGGAGCAGACGCTCACTCAC 1800  
\*\*\*\*\*

wt CCCCCTGCCGGGATGGGAAGAAGCCCTCCATTGCCGCCGTGGGAGCATGGACGCCACCCCAATCGTACTGCCACCGTGCAGCAGCAGCCGAGGAGATCATACAA 1920  
opt CCCCCTGCCGGGATGGGAAGAAGCCCTCCATTGCCGCCGTGGGAGCATGGACGCCACCCCAATCGTACTGCCACCGTGCAGCAGCAGCCGAGGAGATCATACAA 1920  
\*\*\*\*\*

wt GACCTGGCCGCATGGTCCGAGCTCCTCATCCAGTTTACAAGTCCACGGCTTCAAGCCACCCGATCATCTTCTACCAGCAGGCTGCTCTGAAGGCGAGTCCAGCAGGTTCTC 2040  
opt GATCTGGTGCATGGTCCGAGCTCCTCATCCAGTTTACAAGTCCACGGCTTCAAGCCACCCGATCATCTTCTACCAGCAGGCTGCTCTGAAGGCGAGTCCAGCAGGTTCTC 2040  
\*\*

wt CACCACGAGTGTGGCCATCCGTGAGGCTGTATCAAGTGAAGAAAGACTACAGCCCGGATACCTTTCATCGTGGTGCAGAAGAGGACACCACCCCGCTTCTGCACTGACAAG 2160  
opt CACCACGAGTGTGGCCATCCGTGAGGCTGTATCAAGTGAAGAAAGACTACAGCCCGGATACCTTTCATCGTGGTGCAGAAGAGGACACCACCCCGCTTCTGCACTGACAAG 2160  
\*\*\*\*\*

wt AACGAGGGGTTGGAAAGTGAACATTCAGCAGGACAGCTGTGGACAGAAATCACCCACCCACCGAGTTCGACTTCTACCTGTGTAGTCAAGTGGATCCAGGGGACAAGC 2280  
opt AACGAGGGGTTGGAAAGTGAACATTCAGCAGGACAGCTGTGGACAGAAATCACCCACCCACCGAGTTCGACTTCTACCTGTGTAGTCAAGTGGATCCAGGGGACAAGC 2280  
\*\*\*\*\*

wt AGGCCTTCGCACTATCAGTCTCTGGGACGACAATCGTTCTCCTCTGATGAGCTGCAGATCCTAACCTACCAGTGTGTCAACCTACGTCGCTGCACGCTCCGTGCCATCCCA 2400  
opt CGGCCACGCTACCCAGTCTGGGACGACAACCGTTTCAGCAGGACAGCTGTGGACAGAAATCACCCACCCACCGAGTTCGACTTCTACCTGTGTAGTCAAGTGGATCCAGGGGACAAGC 2400  
\*\*\*\*

wt GCGCCAGCATACTACGCTACCTGGTGGCTTCCGGGCGAGTACCACCTGGTGGATAAGGAACATGACAGTGTGAAGGAAGCCATACCTCTGGGCGAGTAAAGGGGAGACCCAA 2520  
opt GCGCCAGCATACTACGCTACCTGGTGGCTTCCGGGCGAGTACCACCTGGTGGATAAGGAACATGACAGTGTGAAGGAAGCCATACCTCTGGGCGAGTAAAGGGGAGACCCAA 2520  
\*\*

wt GCACTGGCAAGGCGTCCAGGTTCAACCAAGACACTGCGCACCATGTACTTGTCTGA 2580  
opt GCCCTGGCAAGGCGTCCAGGTTCAACCAAGACACTGCGCACCATGTACTTGTCTGA 2580  
\*\*

Supplemental Figure 2 Alignment of wildtype (wt) and codon-optimized (opt) Ago-2.

```

wt      ATGGAATCGGCTCCGAGGACCCGCTGGGGCCAGCCCTACTCATGGTGCCAGAACCTGGCTATGGCACCATGGGCAAAACCATTAACTGCTGGCTAACTGTTTCAAGTTGAA 120
opt     ATGGAATCGGCAGCGCCGAGCCCGCCGAGCCAGCCCTGCTGATGGTGCCAGAAAGCCCGGCTACGGCCACCATGGGCAAGCCATCAAGCTGCTGGCCAACTGCTTCCAGGTGGAG 120
*****
wt      ATCCCAAAGATFGATGCTACCTCTATGAGGTAGATATAAACAGACAAAGTGTCTTAGGAGAGTGAACAGGGAGGTGGTTGACTCAATGGTTGACGATTTTAAAGTAACTATATTTGGA 240
opt     ATCCCAAAGATGACAGTGTACCTGTACGAGGTGACATCAAGCCGACAAAGTGTCCGAGGCGGTTGAACCCGGAGGTGGTGGACAGCATGGTGCAGCACTTCAAGGTGACCATGTTCCGCG 240
*****
wt      GACCGTAGACCAGTTTATGATGAAAAAAGAGTCTTTACACCCGCAATCCACTTCCCTGTGGCACTACAGGGGTAGATTAGACGTTACTTTACCTGGGGAAGGTGAAAAAGATCGACCT 360
opt     GACAGACGCCCGCTGTACGAGGCAAGCGGAGCCTGTACACCCGCAACCCCTGCCCTGGCCACCACCGCGCTGGACCTGGACGTGACCTGGCTGGCGAGGGCGCAAGGACCGGCC 360
*****
wt      TTCAAGGTGCAATCAAATTTGCTCTCGGGTGAAGTGGCACCTACTGCATGAAGTACTGACAGGACGGACCTTGCCTGAGCCACTGGAATTAGACAAGCCAAATCAGCACTAACCCCTGC 480
opt     TTTAAGGTGTCATCAAGTTCCTGAGCAGAGTGAAGTGGCACCTGCTGCACAGGTGCTGACCGGACGACACTCCCTGAGCCCTGGACTGGACAAGCCCACTCCACCAACCCCGT 480
*****
wt      CATGCCGTTGATGTTGTACGACATCTGCCCTCCATGAAATACACACTGTGGGGCTTCAATTTTCCGCTCCAGAAGGATATGACCACCTCTGGGAGGGGCGAGGAAGTGTGG 600
opt     CACGCCGTGGACGTTGCTGCGGCACCTGCCAGCATGAAGTACACCCCGTGGCCAGAAAGCTTCTTACGGCCCTGAGGGTACGACCACCCCTGGCGGAGGGGCGGAAGTGTGG 600
*****
wt      TTTGGATTCCATCAGTCTGTCGGCTGCCATGTGAAAAATGATGCTTAATATCGATGTTTCTGCCACTGCCTTCTACAAGCACAACCTGTAATTGAGTTTATGTTGTAAGTTCCTGAT 720
opt     TTCGGTTCACAGAGCTGAGGCCCGCATGTGGAAGATGATGCTGAACATCGAGTGAAGCCACCGCTTCTACAAGGCCAGCCCGTATCCAGTTTATGTTGCGAGGTGCTGCTG 720
*****
wt      ATTCAATAATTTGATGAGCAACCAAGACCTCTGACTGATCTCATCGGGTAAAATTCCAAAAGAGATAAAAGTTTGAAGTTGAAGTACTCATTTGTGGAACAATGAGACGGAAATAC 840
opt     ATCCACAATCGACGAGCAGCCAGGCCCTGACCGACAGCCACCGGGTGAAGTTCACAAAAGAGATAAAGGCTTGAAGTTGAGGTGAGGTGACCACTGGGCAACATGCGCGGAAGTAC 840
*****
wt      CGTGTGTAATGTAACAAGGAGCCCTGCCACTCATCAAACCTTCCCTTACAGTTAGAAAACGGCCAAACTGTGGAGAGAACAGTAGCCAGTATTTAGAGAAAAGTATACTCTTCAG 960
opt     AGAGTGTGCAACGTCACCCGAGGCCCGCCAGCCACGACATTCCTCCAGCTGAAAACGGCCAGACCGTGGAGCGGACCGTGGCCAGTACTTCCGGGAGAAGTATACCTCTCGAG 960
*****
wt      CTGAAGTACCCGACCTTCCCTGCTGCAAGTCGGGCGAGAACAGAAACACACCTACCTGCCACTAGAAGTCTGTAATTTGTCGAGGGCAACGATGATCAAGAAGTAAACAGACAAT 1080
opt     CTGAAGTACCCGACCTTCCCTGCTGCAAGTCGGGCGAGAACAGAAACACACCTACCTGCCCTGCAACATCGTGGCCGCGCAGGAGTGAAGTTCGAGGAGTGAAGTTCGAGGAGT 1080
*****
wt      CAGACTTCCACTATGATCAAGGCAACAGCAAGTCTGCCAGATAGACAAGGAAATTAGCAGATGGTAAAGTGAAGTATGAAACAGATCCATTTGTTCCAGGAGTTTCAATTT 1200
opt     CAGACCAGCACCATGATCAAGGCCACCGCCGCTCCGCCCTGACAGGCGAGGAGATCAGCCGCTGGTCCGGAGCCCACTACGAGACCCACCCCTTCTGTCAGGAATTTCAAGTTC 1200
*****
wt      AAAGTTCGGGATGAAATGGCTCATGTAAGTGGACGCTACTTCCAGCCTATGCTCCAGTATGGGGGCGGAATCGGACAGTAGCAACACCGACCTGGAGTATGGGACATGCGAGGG 1320
opt     AAAGTTCGGGACGAGTGGCCACGTCACCGCAGAGTGTGCTGCCCTGCTGCTGCTGCTGCTGCTGCTGCTGCTGCTGCTGCTGCTGCTGCTGCTGCTGCTGCTGCTGCTGCTGCT 1320
*****
wt      AAACAATCCACAGGAGTTGAAATCAAATGTTGGGCTATCGCTGTTTTCGACACAGAGGCGAGTGCAGAGAAGAAATATGAAGGGTTTCAGACACAGCTGCTGTAAGATTTCTAAG 1440
opt     AAGCAGTTCACACAGGCGTGGAGATCAAGATGTTGGGCTATCGCTGCTTTCGACACAGGCGGAGTGCAGGAGGAAATCCTGAAGGGCTTCCAGGACAGCTGCGGAGAGATCAGCAAG 1440
*****
wt      GATCGAGGATGCCATCCAGGGCCAGCCATGCTTCTGCAATATGACAGGGGGCAGACGCTAGAGCCCATGTTCCGGCATCTCAAGAACACATATTTGCGCTACAGCTTATTATC 1560
opt     GATCGGCGATGCCCATCCAGGGCCAGCCCTGCTTCTGTAAGTACGCTCAGGGCGGCGCAGCGTGGAGCCATGTTCCGGCACCTGAAGAACACCTTCAGGAGGAGTTCAGGAGTATC 1560
*****
wt      GTCATCTGCCGGGAAGACACAGTGTATGCGGAAGTAAACGTTGAGGAGACACACTTTGGGTATGGCTACACAATGTGTTCAAGTCAAGATGTAATAAAACATCTCTCAAAC 1680
opt     GTGATCTGCCGGCAAGCCCGCTGTACGCGGAGTGAAGAGTGGGGACACACTGCTGGCATGGCCACCCAGTGGTGCAGGTCAAGAACGATGATCAAGACCGCCCGCAGCC 1680
*****
wt      CTGTCAAACCTGTCGCTAAAGATAAATGTTAACTCGGAGGATCAATAATATTCTGTACCTCATCAAAGACCTTCTGTGTTCCAGCAACAGTATGATTTTTGGGAGCCGATGCTACT 1800
opt     CTGAGCAACCTGTCGCTAAAGATCAAGTGAAGTGGGGCGCATCAACACATCTGTTGCCACAGAGCCAGCGTGTTCAGCAGCCTGTGATCTTCTGGGCGCCGAGTGAAC 1800
*****
wt      CATCCACTGCTGGTATGAAAGAAGCCCTTCTATTGCTGCTGTTGAGGTAGTATGGATGCACACCCAGCAGATCTGTCCACAGTAAAGTTCAGAGACCCCGACAGGAGATCATC 1920
opt     CACCCCTGCCCGCAGCCGAAAGCCAGCATCGCCGCTGGTCCGCTTATGGATGCCATCCCTCCCGTATTGGCCACCGTGGGGTGCAGCCGCGGCGGAGGAGAAATCATC 1920
*****
wt      CAGGACTTGGCTCCATGGTCGGGAACCTTCTTATTCAATTTATAAGTCAACTCGGTTCAAGCCTACTCGTATCATCTTTTATCGGGATGGTGTTCAGAGGGGCGAGTTAGGAGGTA 2040
opt     CAGGACTTGGCTCCATGGTCCGGAGTGTGATCCAGTTTACAAGACACCCGTTCAAGCCACCCGGATCATCTTCTACCGGAGCGGCTGAGCGAGGGCGAGTCCGCGAGGTG 2040
*****
wt      TTATATTGAACTACTAGCAATTCGAGAAGCCTGCATCAGTTTGGAGAAGACTCAACCTGGAATAACATACATTTGATGTTGAGAAGAGACATCACACTGATTATTTTGTGCTGAT 2160
opt     CTGTACTAGCAACTGCTGCCATCCGGAGGCGCTGCATCAGCTGAAAAGGACTACAGCCCGCATCACTATATCGTGGTGCAGAAGCGGACCAACCCCGGCTGTTTCCGCGGAC 2160
*****
wt      AGGACAGAAAGGGTGGAGAAGTGGCAATATCCAGCTGGAACAACAGTTGATACAGACATTACACACCCATATGAGTTCGATTTTTTACCTCTGTAGCCATGCTGGAATACAGGGTACC 2280
opt     CGGACGAGCGCGTGGCGGTCGCGCAATCCCTGCCGCGCCACCGTGGACACCGATCACCCACCCCTACGAGTTCGACTTCTACTGTTGACAGCCAGCCGCGCATCCAGGGCACC 2280
*****
wt      AGTCGCTTCCACTACTATGTTTATGGGATGATAACTGCTTACTGCAGATGAACCTCAGCTGCTAACTTACCAGCTCTGCCACACTACGTACGCTGATACAGATCTGTTTCTATA 2400
opt     AGCCGCGCCACTACCAGTCTGGGACGCAACTGCTTACCAGCGAGGCTGACAGTGCAGCTGACAGTGCAGCTGACAGTGCAGTGCAGTGCAGTGCAGTGCAGTGCAGTGCAGTGCAG 2400
*****
wt      CCTGCACAGCGTATTTGCTCACTGGTATGATTTAGAGCCAGATATCATCTTGTGGACAAGAATCATGACAGTGTGAAGGAGTTCAGCTTTCAGGACAAGAATGGGCGAGATCCA 2520
opt     CCAGCCGAGCTACTACCCACCTGGTCCCTCCGGCCAGATATCACTGTTGGACAAGAAGCAGCAGCCGAGGGCGCCAGCTGAGCGGCGAGCAACCGCAGGACCC 2520
*****
wt      CAAGCTCTGCCAAGGCTGTACAGATTACCAAGATACCTTACGCACAATGTACTTCGCTTAA 2583
opt     CAGGCTCGGCCAAGCTGTCCAGATCCACAGGACACCTTCCGACCATGTACTTCGCTGA 2583
*****

```

Supplemental Figure 3 Alignment of wildtype (wt) and codon-optimized (opt) Ago-3.

wt ATGAGGCGCTGGACCCGGACCTCCGGCTAGCCTGTTTCAGCCACCTCGTCTGCTGGCCTTGGAACTGTTGGAAAACCAATTCGACTGTTAGCCAACTCATTTCAGGTTGAGATTCCT 120  
opt ATGGAAGCCCTGGGCCCTGGCCCTCCCGCCAGCCTGTTCCAGCCCCCAGGCGCCCTGGCCTGGGACCGTGGGCAAGCCCATCCGGCTGCTGGCCAACCCTTCAGTCCAGATCCCC 120  
\*\*\*\*\*  
wt AAAATAGATGTGTACTACTATGATGTGGATATTAAGCCTGAAAACGGCCTCTAGAGTCAACAGGGAGGTAGTAGATACAATGGTGGCCACTTCAAGATGCAAAATTTGGTGTATCGG 240  
opt AAGATCGACGTGTACCACACTACGACGTGGACATCAAGCCCGAGAAGCGGCCAGCGGGTGAACCGGGAGGTGGGACCCATGGTCCGGCACTCAAGATCGAGATCTTCGCGCAGCCG 240  
\*\*\*\*\*  
wt CAGCCTGGGTATGATGGCAAAAGAACATGTACACAGCACATCCACTACCAATGGACGGATAGGTTGATATGGAGGTGACTCTTCCAGCGGAGGGTAAAGACCAAAACATTTAAAGTG 360  
opt CAGCCCGCTACAGCGCAAGCGAACATGTACACCCGCCACCCCTGCCATCGCCGGGACCGGTGGACATGGAAGTGACCTGCCCGGAGGGCAAGGACCAAGACCTTCAAGTG 360  
\*\*\*\*\*  
wt TCTGTTCACTGGGTGTGAGTGTGAGCCTCAGTGTCTTTAGAAGCTTGGCTGGGCACTTGAATGAAGTCCCAGATGACTCAGTACAAGCACTTGTATGTTATCACAAGACACTTCCC 480  
opt TCCGTGCACTGGGTGTGCTGTGTGCTCAGCTGCTGCTGGAGCTCTCGCTGGACATCTGAACAGGTGCCGACAGCGTGCAGCCCTGCAGCTGATCACCAGCCCTGCC 480  
\*\*\*\*\*  
wt TCCATGAGGTACACCCAGTGGGCCGTTCTCTTTTCTACCCCCGGAAGTTACTACCACCTCTGGGAGGGGGAGGGAGGTCTGGTTGGTTTTCATCAGTCTGTGAGACCTGCCATG 600  
opt AGCATGCGGTACACCCCGTGGCGAGAAGCTTCTTCAGCCCCCTGAGGGCTACTACCACCCCTGGCGGAGGGCGGAAGTGTGTTCCGGCTCCACCAGAGCGTGGGCCCGCCATG 600  
\*\*\*\*\*  
wt TGAATATGATGCTCAACATTTGATGTATGTCAACTGCTTCTACCGGCTCAGCCTATCATTGAGTTCATGTGTGAGGTTTGTAGACATTCAGAACATCAATGAACAGACAAAACCTCTA 720  
opt TGAACATGATGCTGAACATCGAGTGAAGCCACCCTCTCAGAGCCAGCCATCATCGAGTTCATGTGCGAGGTGCTGGACATCCAGAACATCAACGAGCAGACCAAGCCCTG 720  
\*\*\*\*\*  
wt ACAGACTCCACGCTGTCAAATTTACCAAGAAATCAGAGGTCTCAAAGTTGAGGTGACCCACTGTGGACAGATGAACGAAAATACCGAGTTTGTAAATGTACTAGACGGCCAGCCAGT 840  
opt ACCGACAGCCAGCGGTGAAGTTCAACAAAGAGATCCGGGGCTGAAGTGGAGGTGACCCACTGGGGCAGATGAAGCGGAAGTACAGAGTGTCAACGTGACCAAGGAGCCCGCCAGC 840  
\*\*\*\*\*  
wt CATCAAATTTTCTTTGCAAGTGAAGAAACCGTCAAGCTATGGAATGTACAGTGTCAATATTTAAGCAAAAGTATAGTGTCAACTGAATACCCCACTCTTCCCTGTCTCCAAGT 960  
opt CACCAGACATTTCCACTGCAGTGGAAAACGGCCAGGCCATGGAATGCACCGTGGCCAGTACTTCAAGCAGAAGTACAGCCTGCAGCTGAAGTACCCCACTGCCCTGCCCTGCAAGT 960  
\*\*\*\*\*  
wt GGCAAGAACAAGCATACATACTTGCACCTCGAGTCTGTAATATAGTGGCAGGACAGCGTGTATCAAGAAGTCAACAGCAATCAGACTTCCACAATGATCAAAGCTACAGCA 1080  
opt GGCAGAACAGCAAGCAGCTTCCCTCTCGAAGTCTCGAAGTCTCGAAGTCTCGCAGGAGCGGGTGTATCAAGAAGTCAACAGCAATCAGACTTCCACAATGATCAAAGCTACAGCA 1080  
\*\*\*\*\*  
wt TCTGCTCCTGACAGACAGGAAGAGATCAGTAGACTGGTGAAGCAACAGATGTTGGTGGTGGACCTGATCCATACCTTAAAGAAATTTGGTATTGTTGTCACAATGAATGACAGAGCT 1200  
opt AGCCCCCTGACAGGCAAGAGATCAGCGGCTGGTGAAGCAACAGATGTTGGTGGTGGACCTGATCCATACCTTAAAGAAATTTGGTATTGTTGTCACAATGAATGACAGAGCT 1200  
\*\*\*\*\*  
wt ACAGGCAGGTACTTCCAGCACCAATGCTGCAATATGGAGGCGGAATAAAACAGTAGCCACACCCAAACAGGTTGTCTGGGACATCGGAGAAAGCAGTTTTATGCTGGCATTGAAAT 1320  
opt ACCGGCAGAGTGTGCTGCCCATGCTGCAATGCTGCAAGTACGGCGGCGAAGAACAGCGTGGCCACCCCAACAGGCGTGTGGGACATCGGAGCAAGCAGTTTACGCGCCATCGAGAT 1320  
\*\*\*\*\*  
wt AAAGTTTGGCAGTGTCTGTTTGTGCACCTCAGAAACAATGAGGAGAGTTTACTAAGAGTTTCACTGACCAAGTGTGTAATCTTAAAGATGCAAGAAATGCCATCCAGGGTCA 1440  
opt AAAGTGTGGCCGTGGCTGCTTCCGCCCCAGAGCAGTGGCCGGAGGACCTGCTGAAGAGCTTCAACGACAGCTGGGCAAGATCAGCAAGGACGCGGCGATGCCCATCCAGGGCCAG 1440  
\*\*\*\*\*  
wt CCATGTTTCTGCAAGTATGACAAAGTGCAGACAGTGGAGCCTATGTTTAAACATCTGAAAATGACTTATGTGGCCCTACAGCTAATAGTGGTTATCCTGCCTGGAAGACACCAGTA 1560  
opt CCACTGCTCTGTAAGTACCTCAGGGCCGACAGCGTGGAGCCATGTTCAAGCAGCTGAAGATGACTACGTGGGGTGCAGCTGATCGTGGTGTGATCGGCTGGCAGGACCCCGCTG 1560  
\*\*\*\*\*  
wt TATCGGGAGGTGAACAGTGTGGAGATACCTTCTAGGTATGGCCACAGTGTGTCAGGTAAAAATGTAGTGAAGACCTCACCTCAAACCTTTCCAATCTTGTGCTGAAGATAAAT 1680  
opt TACGCCAGGTGAAGAGAGTGGGGACACACTGCTGGGATGGCCACCCAGTGGTGCAGTCAAGAACTGTTGAAACCCAGCCCGAGCCCTGAGCAAGCTGTGCTGAGATCAAC 1680  
\*\*\*\*\*  
wt GCAAAATTTGAGGAATTAACAATGTGCTTGTGCTCATCAAAGCCCTCGTGTCCAGAGCCTGTACTTCTGGAGCGGATGTACACACCCCCAGCAGGGGATGGGAAGAAA 1800  
opt GCCAAGTGGCGCATCAACAAGTGTGCTGCTGCCACCAGAGCCCTCGTGTCCAGAGCCGCTGATCTTCTGGGCGGACGTGACCCACCCCTGCCGGCAGGGGAGAA 1800  
\*\*\*\*\*  
wt CTTTCCATTGCTGCTGTTGGTGGCAGTATGGATGGCCACCCAGCCGTTACTGTGCCACCTTCGGTGCAGACTTCCCGGAGGAGATCTCCCAAGAGCTCCTTACAGTCAAGAGT 1920  
opt CCCAGCATCGCCCGTGGTGGCGAGTGGACGGCACCCAGCCGTTACTGGCCACCTGGCCAGCCGCGGAGAAATCAGCCAGCAGGAAATCAGCCAGCAGGAACTGCTGTACAGCAGGAATG 1920  
\*\*\*\*\*  
wt ATCCAGGACCTGACTAACATGGTTCGAGAGCTGTGATTCAGTTCTACAAATCCACAGCTTCAAACCCACTCGGATCATCTATTACCGTGGAGGGGTATCTGAGGGACAAATGAAACAG 2040  
opt ATCCAGGACCTGACCAACATGGTTCGAGAGCTGTGATTCAGTTCTACAAATCCACAGCTTCAAACCCACTCGGATCATCTATTACCGTGGAGGGGTATCTGAGGGACAAATGAAACAG 2040  
\*\*\*\*\*  
wt GTAGCTTGGCCAGAATAATAGCAATTCGAAAGCATGTATTAGCTTGAAGAAGATTACCAGGAGGAAATTAATTTATGTTGTTGCAAAAAAGACATCACACAGACTTCTTGTGCA 2160  
opt GTGGCCTGGCCGAGTGTATGCCATCCGGAAGCCCTGCATCAGCTTGAAGAGGACTACAGGCGCGCATCCTACATTTGGTGCAGAAAGCGCCACACCCCGGCTGTTCTGCGCC 2160  
\*\*\*\*\*  
wt GATAAAACAGAAAGGTTAGGAAAAGTGGCAATGTACCAGCAGGCACTACAGTGGATAGTACCATCACACATCCATCTGAGTTTGACTTTTACCTCTGTAGTATGCAGGAATACAGGGA 2280  
opt GACAAGACGAGCCGTTGGCAAGAGCGCAACCTGCCTGCCGACCCAGCTGGACAGCACCATCACCCACCCAGGAGTTCAGCTTCTACTGTGAGCCAGCCCGGATTCAGGC 2280  
\*\*\*\*\*  
wt ACCAGCCCTCCCTCACATTACCAGTCTTGTGGGATGACAACCTTCACTGCAGATGAATCCAGCTACTGACTTACCAGCTGTGTACACCTATGTGAGGTGCACTCGCTCAGTCTCT 2400  
opt ACAAGCAGCCAGCCAGCTGTGGGAGCAGCAACTGCTTCCAGCGGAGCAACTGCTTCCAGCGGAGCAACTGCTTCCAGCTGCTCACTTACCAGCTGTGCCACACTACGTCAGCCGCTGCGT 2400  
\*\*\*\*\*  
wt ATTCCAGCCCTGCATATTTATGCCCGGCTGTAGCAATTTAGGGCAAGGTATCATCTGGTGGATAAAGATCATGACAGTGGGAAAGGAGTCAATGTTGTCAGGACAGGCAACGGCCAGAT 2520  
opt ATCCCTGCCCTGCTACTACGCCAGACTGGTGGCTTCCGGCCAGATACCACCTGGTGGCAAGGACACGACAGCCCGGAGGGCAGCCAGTGGCCGCGAGGCAACGGCAGG 2520  
\*\*\*\*\*  
wt CCTCAGCCCTGGTAAGGCTGTGCAAAATCCACCATGATACCAGCACAGCATGATTTTGCCTGA 2586  
opt CCCAGGCTGTGGCAAGGCGTGCAGATCCATCAGCACACAGCACACCATGTACTTCGCTGA 2586  
\*\*\*\*\*

Supplemental Figure 4 Alignment of wildtype (wt) and codon-optimized (opt) Ago-4.

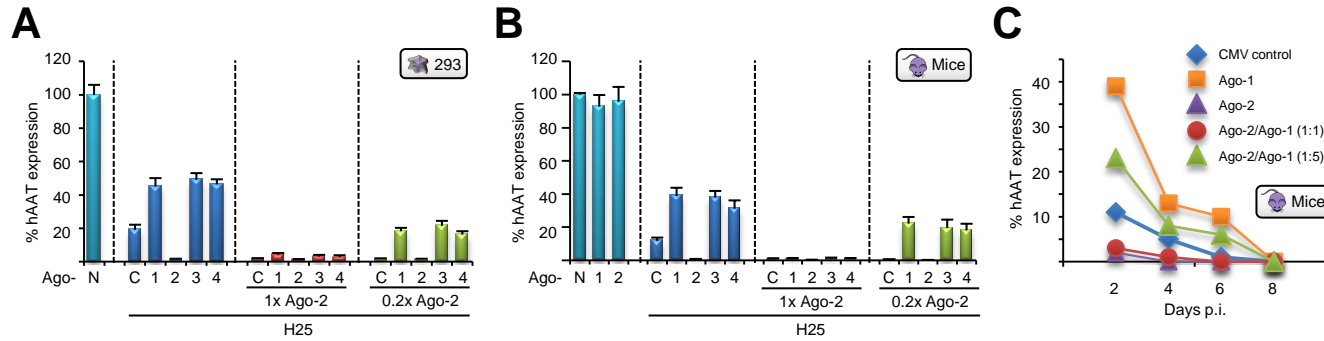

**Supplemental Figure 5** Validation of the key role of human Ago proteins and of their competition for shRNA activity. Co-transfection of individual Ago proteins, or of equimolar (1x) or sub-molar (0.2x) amounts of Ago-2 with the other three human Ago proteins, into cells (**A**) or mice ( $n = 3$  to  $5$ , day 2) (**B**). Also added were hAAT expression and H25 shRNA plasmids. Note the dominant positive effect of Ago-2 on shRNA activity that could only be out-competed with the other Agos when they were delivered in excess. N; non-shRNA-transfected control. (**C**) Kinetics of competition and hAAT knockdown in murine livers ( $n = 2$ ) hydrodynamically transfected with hAAT expression plasmid, H25 shRNA and the indicated Ago combinations. In all assays (**A-C**), the presence of exogenous Ago-2 markedly enhanced shRNA activity, validating and extending the data in Figure 1.

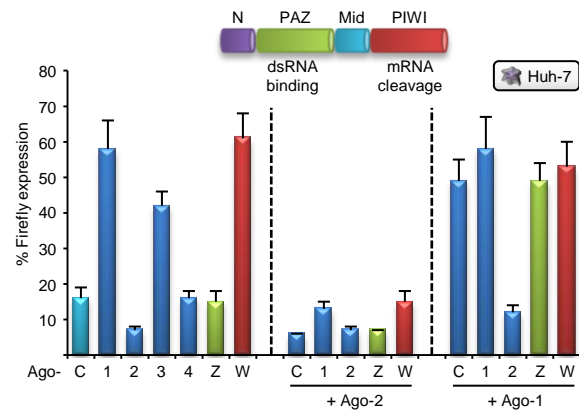

**Supplemental Figure 6** Competition of wildtype and cleavage-deficient Ago-2 for shRNA activation (confirmation with an alternative reporter, see Figure 1, G and H for details). Huh-7 cells were co-transfected with a Firefly reporter, luc29 shRNA and the indicated Ago constructs ("+" indicates a four-fold excess of competitor).

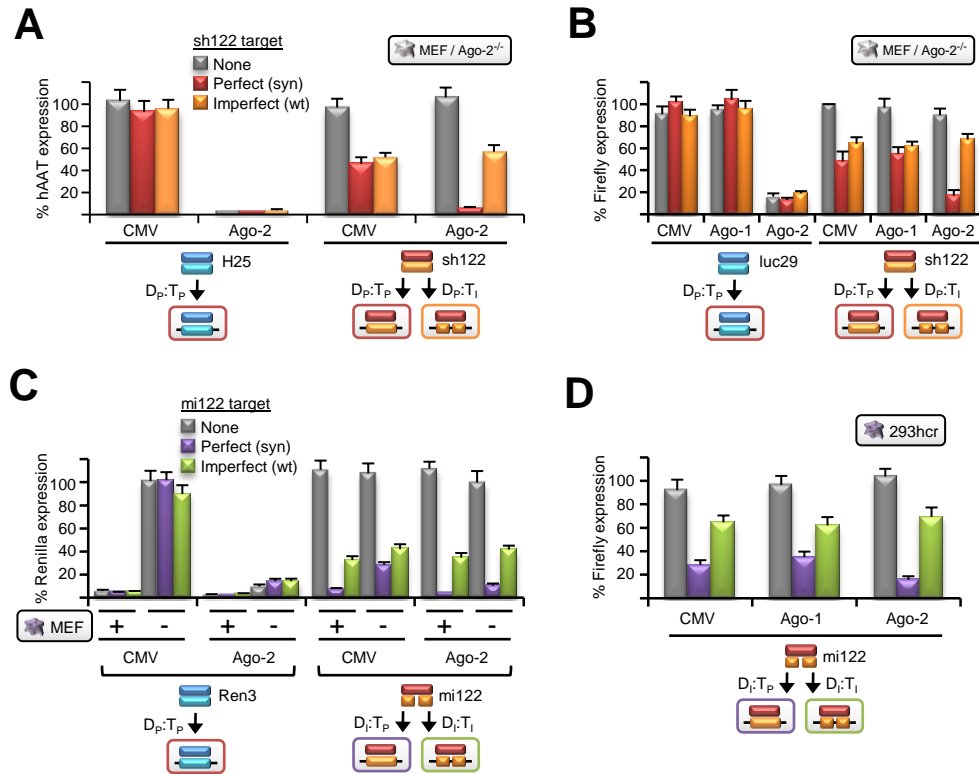

**Supplemental Figure 7** Further evidence for varying Ago-2 dependency of RNAi triggers. (A) Figure 2, B-D suggested that shRNAs against imperfect 3'UTR targets depend less on Ago-2 than those against perfect targets (ORF or 3'UTR), at least under transient conditions. This was substantiated here in Ago-2 knockout cells (MEF/Ago-2<sup>-/-</sup>), where anti-ORF D<sub>p</sub>:T<sub>P</sub>-H25 was inactive, while anti-3'UTR D<sub>p</sub>:T<sub>P</sub>- and D<sub>p</sub>:T<sub>I</sub>-sh122 were similarly potent (compare red and orange bars in the absence of Ago-2 ("CMV")). Ago-2 co-delivery enhanced D<sub>p</sub>:T<sub>P</sub>-H25 and D<sub>p</sub>:T<sub>P</sub>-sh122, but not D<sub>p</sub>:T<sub>I</sub>-sh122 activities. This was further confirmed with another reporter (Firefly, B). (C) For evaluation with miRNAs, we transfected Ago-2-positive (+) or -negative (-) MEFs with D<sub>i</sub>-miR-122 expression plasmid or anti-ORF D<sub>p</sub>-shRNA (Ren3, same results were obtained with two other shRNAs, Ren1/2), together with luciferase reporters tagged with perfect or imperfect miR-122 sites. The fact that D<sub>i</sub>:T<sub>P</sub> and D<sub>i</sub>:T<sub>I</sub> miRNA activity were conserved in Ago-2<sup>-/-</sup> cells in the absence of exogenous Ago-2 ("-/CMV"), while the control shRNA was inactive (as noted before, A,B above), validated that miRNAs principally act independently of Ago-2. Notably, D<sub>i</sub>:T<sub>P</sub> miRNA activity was consistently enhanced upon Ago-2 co-delivery both in wildtype and Ago-2<sup>-/-</sup> cells. This implied that with artificial perfect targets, high miRNA levels (estimated >10<sup>5</sup> copies / transfected cell) can also saturate Ago-2. This is in line with our in vivo data in Figure 2G and was further validated in 293 cells inducibly expressing ~25,000 miR-122 copies (293hcr), where D<sub>i</sub>:T<sub>P</sub> activity also increased with Ago-2 expression (D, purple). Mutant cells with an inactive miR-122 served as negative control (not shown). Again validating the data in Figure 2G, D<sub>i</sub>:T<sub>I</sub> activity was always unaffected by ectopic Ago-2, suggesting no Ago-2 saturation with imperfect triggers against imperfect targets (C,D, green bars). Alas, as discussed in the main text, this combination is not therapeutically useful.
